1 **Large-Scale Longitudinal Comparison of Urine Cytological Classification Systems Reveals**  
2 **Potential Early Adoption of The Paris System Criteria**

3  
4 Joshua J. Levy PhD<sup>1,2,3,4,\*</sup>, Xiaoying Liu MD<sup>1,6</sup>, Jonathan D. Marotti MD<sup>1,6</sup>, Darcy A. Kerr  
5 MD<sup>1,6</sup>, Edward J. Gutmann MD, AM<sup>1,6</sup>, Ryan E. Glass MD<sup>5</sup>, Caroline P. Dodge<sup>6</sup>, Louis J.  
6 Vaickus MD, PhD<sup>1,6</sup>

- 7 1. Emerging Diagnostic and Investigative Technologies, Department of Pathology and  
8 Laboratory Medicine, Dartmouth Hitchcock Medical Center, Lebanon, NH, 03766
- 9 2. Department of Dermatology, Dartmouth Hitchcock Medical Center, Lebanon, NH, 03766
- 10 3. Department of Epidemiology, Dartmouth College Geisel School of Medicine, Hanover,  
11 NH, 03756
- 12 4. Program in Quantitative Biomedical Sciences, Dartmouth College Geisel School of  
13 Medicine, Hanover, NH, 03756
- 14 5. UPMC East, Pittsburg, PA, 15146
- 15 6. Dartmouth College Geisel School of Medicine, Hanover, NH, 03756

16  
17 \* To whom correspondence should be addressed: [joshua.j.levy@dartmouth.edu](mailto:joshua.j.levy@dartmouth.edu)

18  
19 **Author Contributions**

20 JL and LV: conceptualization, formal analysis, funding acquisition, investigation, methodology,  
21 project administration, resources, software, supervision, validation, visualization, writing -  
22 original draft; XL, JM, DK, EG, RG, CD, LV: data curation; all authors: writing - review and  
23 editing

24 **Abstract**

25 Urine cytology is used to screen for urothelial carcinoma in patients with hematuria or risk  
26 factors (e.g., smoking, industrial dye exposure) and is an essential clinical triage and longitudinal  
27 monitoring tool for patients with known bladder cancer. However, urine cytology is semi-  
28 subjective and thus susceptible to issues including specimen quality, inter-observer variability,  
29 and “hedging” towards equivocal (“atypical”) diagnoses. These factors limit the predictive value  
30 of urine cytology and increase reliance on invasive procedures (cystoscopy). The Paris System  
31 for Reporting Urine Cytology (TPS) was formulated to provide more quantitative/reproducible  
32 endpoints with well-defined criteria for urothelial atypia. TPS is often compared to other  
33 assessment techniques to justify its adoption. TPS results in decreased use of the atypical  
34 category and better reproducibility. Previous manuscripts comparing diagnoses pre- and post-  
35 TPS lacked a longitudinal component and thus failed to consider temporal differences between  
36 diagnoses made under prior systems and TPS. By aggregating across time, studies may  
37 underestimate the magnitude of differences between assessment methods. We conducted a large-  
38 scale longitudinal reassessment of urine cytology using TPS criteria from specimens collected  
39 from 2008 to 2018, prior to the mid-2018 adoption of TPS at an academic medical center.  
40 Findings indicate that differences in atypical assignment were largest at the start of the period  
41 and these differences progressively decreased towards insignificance just prior to TPS  
42 implementation. This finding suggests that cytopathologists had begun to utilize the quantitative  
43 TPS criteria prior to official adoption, which may more broadly inform adoption strategies,  
44 communication, and understanding for evolving classification systems in cytology.

45

## 46 **Introduction**

47 Urothelial carcinoma is a cancer that demands attention because it is both common (7th leading  
48 cause of malignancy) and has the highest recurrence rate of any cancer (70%)<sup>1,2</sup>. Diagnostic  
49 protocols and clinical triage are based on a combination of urine cytology, cystoscopy +/- biopsy,  
50 and immunocytochemical and molecular studies, with resultant longitudinal follow-up for  
51 negative and atypical findings. While cystoscopy followed by biopsy with histological  
52 examination is the accepted standard for diagnosis, urine cytology is the preferred mode for  
53 detection and screening because: it is inexpensive; has a rapid turn-around time; and specimens  
54 are relatively easy to obtain. Abnormal cytology findings usually trigger more invasive and  
55 expensive assessment methods (e.g., cystoscopy, FISH)<sup>4,5</sup>, though further investigation is  
56 important because these assessments determine treatment options, ranging from follow-up urine  
57 cytology to chemotherapy or surgery. This sequence is not entirely foolproof since abnormal  
58 cytological findings are subject to a high “false positive” rate (i.e., urine specimen is perceived to  
59 be abnormal while cystoscopy/biopsy leads to negative finding). Cytology-based examination is  
60 the currently accepted method for the detection of high-grade urothelial carcinoma (HGUC)  
61 while assessment of specimens for low-grade urothelial carcinoma (LGUC) is subject to variable  
62 cytomorphological features, which limits confidence in the findings. High inter-rater variability  
63 and equivocal findings are factors which still adversely impact urine cytology for screening<sup>6,7</sup>.  
64 Surgical biopsy, while often considered the gold standard for bladder cancer is also fraught with  
65 sampling issues that may result in a negative biopsy on an unequivocally positive cytology result  
66 <sup>8</sup>.  
67

68 Several reporting and classification systems have been developed for assessing Urine Cytology  
69 (UC), yet many such systems failed to gain widespread adoption due to inconsistent terminology  
70 and grading criteria or overly complex scoring metrics <sup>9</sup>. As assessment perspectives have shifted  
71 toward quantitative endpoints of cytological atypia, The Paris System for Reporting Urinary  
72 Cytology (TPS), conceived of in 2013 and officially published in 2016, has emerged as the  
73 widely agreed upon classification system for urine cytology bladder cancer screening <sup>2</sup>.  
74 Cytologists using TPS typically assess the individual urothelial cells of a cytology specimen for  
75 features of atypia (nuclear hyperchromasia, high nuclear to cytoplasm area ratio (NC ratio),  
76 nuclear membrane irregularities, chromatin abnormalities), culminating in the assignment of UC  
77 diagnostic categories (four ordered classes: negative, atypical, suspicious, positive). Assignment  
78 to diagnostic categories typically leads to the following triaged responses: 1) interval follow-up  
79 if negative, 2) follow-up and potentially ancillary tests if atypical, and 3) cystoscopy and biopsy  
80 if suspicious or positive. Diagnosis of high-grade urothelial carcinoma (positive) includes  
81 following criteria: 1) at least 5 malignant urothelial cells, 2) NC ratio at or above 0.7, 3)  
82 markedly irregular nuclear membrane, 4) coarse/clumped chromatin and 5) nuclear  
83 hyperchromasia. A suspicious UC finding denotes uncertainty for a positive diagnosis but  
84 assignment into either class (suspicious/positive) often leads to the same disease management as  
85 aforementioned. At times, not all diagnostic criteria for malignancy may be satisfied due to a  
86 variety of confounding reasons (e.g., variable/confluent cellularity, unreliable NC ratio estimates,  
87 degenerated cells, specimen preparation), which may preclude ordering of a cystoscopy or  
88 biopsy. Hypothetically, the cystoscopy or biopsy could yield positive results if the tests were  
89 ordered <sup>10-15</sup>. While high inter-observer variability and lower levels of diagnostic precision are

90 still reported for TPS for some of the diagnostic categories, TPS is still preferred to the prior  
91 mode of cytological assessment (assigned acronym: PMC) <sup>16</sup>.

92

93 Though TPS aimed to reduce this tendency, a remaining impediment to reliable urine cytology  
94 assessment is the assignment of “atypia”, which serves as a “catch-all” term often overused by  
95 pathologists to hedge against a negative, suspicious or positive UC diagnosis <sup>17-19</sup>. The atypical  
96 category is especially problematic because many clinicians interpret it as “effectively negative”.

97 TPS introduced diagnostic criteria designed to define “atypical urothelial cells” with emphasis on  
98 reporting major criterion of an NC ratio of at least 0.5, while relaxing assessment of other  
99 criteria (minor criteria): 1) nuclear hyperchromasia, 2) nuclear membrane irregularity and 3)

100 chromatin quality. The criteria for atypia, in comparison to suspicious or positive, only requires

101 identification of 2 (1 major, 1 minor criteria) of these features. Furthermore, atypia in TPS

102 should exclude morphologic alterations attributable to a lithiasis or infections. Introduction of

103 these diagnostic criteria under TPS serve to standardize assessment by encouraging assignment

104 of a definitive diagnosis (negative, positive) or a slightly hedged diagnosis (suspicious) to avoid

105 conflating loose criteria under PMC. However, reclassification under TPS has been shown to

106 have relatively modest impact on the predictive value for UC despite avoidance of atypia

107 classification, in part due to high interobserver variability and further complicated by the

108 presence of other potential confounding benign cell types (e.g., seminal vesicle cells, glandular

109 cells, inflammatory cells, etc.). In addition, urothelial cell clusters can be challenging to assess

110 due to ambiguous assessment criteria and blended cell borders.

111

112 Previous studies have sought to compare TPS to PMC to determine if the incidence of atypical  
113 diagnoses had changed using the standardized criteria<sup>17,18,20-27</sup>. The prior studies have been  
114 cross-sectional in nature and were of limited sample size. Furthermore, few studies have assessed  
115 the impact of architectural barriers (e.g., excessive blood, confluent cellularity,) and human  
116 barriers (e.g., cytopathologist bias and human factors, i.e., fatigue, training, workload) for  
117 diagnosis<sup>28-31</sup>.

118  
119 In this study, we performed a longitudinal assessment of diagnostic differences between TPS and  
120 PMC in a retrospective cohort of nearly 1,300 specimens from 2008-2018, collected prior to the  
121 May 2018 implementation of TPS guidelines at an academic medical center, to assess how  
122 implementation of the TPS system influenced diagnoses. We hypothesized that, in agreement  
123 with previous studies, TPS assessments would yield fewer atypical assignments than PMC, but,  
124 uniquely, we were also interested in assessing and accounting for the time frame over which the  
125 adoption occurred. Longitudinal changes in PMC assessments may carry far-reaching  
126 implications for studies evaluating the implementation of cytology reporting systems, in that  
127 early, informal dissemination and discussion of materials might influence adoption. If such  
128 factors are identified, they could shed new light on optimal adoption strategies for new reporting  
129 criteria and technologies. A longitudinal assessment is important for determining the scope of  
130 such investigations.

131

## 132 **Methods**

### 133 **Data Collection**

134 After Institutional Review Board approval, we collected 1,277 urine samples across 141 patients  
135 (8 (Q1=5; Q3=12; IQR=7) repeat measurements per patient based on longitudinal follow-up)  
136 prior to incorporation of the TPS system at our institution, Dartmouth-Hitchcock Medical Center  
137 (DHMC). Sample collection did not reflect true incidence of UC classifications in the  
138 population, but were chosen to ensure a mix of different classifications for comparison between  
139 the two assessment methods. Urine samples, most of them voided, were prepared using  
140 ThinPrep® and Pap-stained prior to visual microscopic examination of the cytology slide.  
141 Pathologic examination was done using Olympus microscopes of various makes. Primary UC  
142 diagnoses were assigned at the time of collection by 10 different cytopathologists under the PMC  
143 system. The PMC system consisted of four diagnostic options ("Negative", "Atypical",  
144 "Suspicious", and "Malignant") without standardized criteria being applied.

145  
146 After collecting PMC assessments from the original cytology report, all specimens were re-  
147 assessed by five cytopathologists explicitly considering TPS criteria; cytopathologists were not  
148 aware of the original diagnosis. Formal implementation of TPS occurred at DHMC in May 2018  
149 and included the creation of specific TPS diagnostic categories within our Cerner Millennium  
150 system ("Negative for High Grade Urothelial Carcinoma", "Atypical Urothelial Cells",  
151 "Suspicious for High Grade Urothelial Carcinoma", and "Positive for High Grade Urothelial  
152 Carcinoma"). Immediately prior to implementation, the cytopathologists met as a group to  
153 review TPS criteria, and the TPS criteria were presented at a genitourinary tumor board.

154  
155 Four of the five pathologists who reassessed with TPS had also made previous assessments under  
156 PMC, but slides were selected to ensure the same pathologist did not assess the same slide twice.

157 We also recorded whether the slide contained any significant cytological artifacts/confounders  
158 (e.g., blood, neobladder, confluent cellularity, etc.) that could impact assignment of high/low  
159 risk. Nondiagnostic and undetermined samples were removed from the analysis. We additionally  
160 recorded demographic information and collection date (**Table 1**). We also collected all PubMed  
161 articles directly referencing TPS across the study period by querying PubMed with the search  
162 term “The Paris System” and removing articles unrelated to urine cytology. For each article, we  
163 recorded the publication year and number of articles citing these publications by the writing of  
164 this work as a measure of lasting influence.

165  
166 **Table 1:** Demographic characteristics of study participants; specimen source, history and  
167 whether an artifact (e.g., blood, confluent cellularity, neobladders and viewing artifacts, anything  
168 that could impact assessment quality) was present was registered on the specimen level, while  
169 patient demographics (age, sex) were registered on the patient level; for these tables information  
170 that could not be determined was removed

| Source       | N (%)      | History                | N (%)         |
|--------------|------------|------------------------|---------------|
| Barbotage    | 6 (0.6)    | Bladder Cancer         | 943 (86.6)    |
| Catheterized | 10 (0.9)   | Hematuria              | 110 (10.1)    |
| Cystoscopic  | 36 (3.3)   | Other                  | 36 (3.3)      |
| Ileal        | 18 (1.7)   |                        |               |
| Neobladder   | 7 (0.6)    | Artifact Present N (%) | 236 (21.7)    |
| Nephrostomy  | 2 (0.2)    |                        |               |
| Voided       | 986 (90.5) | Patient Demographics   |               |
| Wash         | 14 (1.3)   | Age (mean (SD))        | 71.87 (10.94) |
| Other        | 10 (0.9)   | Sex = M (%)            | 106 (75.7)    |

171  
172 **Diagnostic Differences between PMC and TPS**

173 Assignment of UC categories with PMC and TPS were compared by cross-tabulating diagnoses  
174 into a table form to visualize changes between the two systems. Several Bayesian hierarchical  
175 logistic regression models were fit to the data in order to ascertain: 1) were cytopathologists  
176 operating under TPS less likely to assign atypical class, and 2) whether the PMC assignments  
177 began to resemble TPS nearing the end of the collection period (Appendix “Estimating  
178 Diagnostic Changes between PMC and TPS across Time”). Separately, overall agreement  
179 between the two systems was approximated through calculation of the intra-class correlation



180 coefficient (*ICC*; Appendix “Overall Differences between PMC and TPS”). Pathologists who  
 181 assessed fewer than ten slides were removed from the statistical analyses. Collection dates were  
 182 mean-centered and units were scaled to years. Odds ratios (OR) were reported to communicate  
 183 effect size. Statistical significance was assessed using calculation of the 95% high density  
 184 posterior credible interval (CI), analogous to the confidence interval, and the probability of  
 185 direction, *pd*, related to the p-value ( $p \approx 2 * (1 - pd)$ ; “p-value”). An OR and corresponding CI  
 186 less than one indicates a negative association with the outcome or decreased likelihood, while  
 187 greater than one indicates a positive association or increased likelihood given one unit increase in  
 188 the predictor. Model fitting was accomplished using the R v3.6 statistical language via the *brms*  
 189 package, with post hoc comparisons via the *emmeans* package<sup>32–36</sup>.

190

## 191 Results

192 **Table 2:** Cross-tabulation of UC class assignments by cytopathologists operating under PMC  
 193 and TPS across the entire study period (2008-2018)

| UC Class |            | TPS      |          |            |          | Total |
|----------|------------|----------|----------|------------|----------|-------|
|          |            | Negative | Atypical | Suspicious | Positive |       |
| PMC      | Negative   | 601      | 44       | 0          | 0        | 645   |
|          | Atypical   | 120      | 183      | 33         | 4        | 340   |
|          | Suspicious | 1        | 24       | 40         | 18       | 83    |
|          | Positive   | 0        | 3        | 10         | 21       | 34    |
|          | Total      | 722      | 254      | 83         | 43       | 1102  |

194

195 **Table 3:** Estimated intra-class correlation coefficients for each UC class as a measure of  
 196 agreement between PMC/TPS

| UC Class   | ICC   | 2.5% CI | 97.5% CI |
|------------|-------|---------|----------|
| Negative   | 0.908 | 0.876   | 0.937    |
| Atypical   | 0.744 | 0.671   | 0.804    |
| Suspicious | 0.775 | 0.689   | 0.852    |
| Positive   | 0.903 | 0.834   | 0.957    |
| Overall    | 0.907 | 0.883   | 0.929    |

197

198 **Table 4:** Reported effect estimates and “p-values” which compare odds of obtaining UC class  
 199 given TPS versus odds of obtaining UC class given PMC; odds ratio greater than one indicates  
 200 that assignment of UC was associated with TPS over PMC, whereas odds ratio less than one  
 201 indicates UC assignment was associated with PMC over TPS; odds ratios were calculated: a)  
 202 across all timepoints (*Overall*), and separately using the conditional effects from the interaction  
 203 term– b) first date of collection in 2008 ( $T=2008$ ) and c) last date of collection in 2018 prior to  
 204 implementation of TPS ( $T=2018$ )

| UC Class   | Versus     | Date    | Odds Ratio  | 2.5% CI     | 97.5% CI     | p                |
|------------|------------|---------|-------------|-------------|--------------|------------------|
| Negative   | Other      | Overall | <b>3.56</b> | <b>2.18</b> | <b>6.02</b>  | <b>&lt;0.001</b> |
|            |            | T=2008  | <b>9.05</b> | <b>3.47</b> | <b>23.94</b> | <b>&lt;0.001</b> |
|            |            | T=2018  | 1.22        | 0.45        | 3.18         | 0.69             |
| Atypical   | Other      | Overall | <b>0.37</b> | <b>0.25</b> | <b>0.54</b>  | <b>&lt;0.001</b> |
|            |            | T=2008  | <b>0.18</b> | <b>0.09</b> | <b>0.36</b>  | <b>&lt;0.001</b> |
|            |            | T=2018  | 0.83        | 0.36        | 1.73         | 0.66             |
| Suspicious | Other      | Overall | 1.03        | 0.65        | 1.67         | 0.89             |
|            |            | T=2008  | 1.11        | 0.42        | 3.07         | 0.82             |
|            |            | T=2018  | 0.94        | 0.30        | 3.22         | 0.91             |
| Positive   | Other      | Overall | 1.56        | 0.59        | 4.30         | 0.38             |
|            |            | T=2008  | 1.19        | 0.14        | 9.57         | 0.86             |
|            |            | T=2018  | 2.20        | 0.18        | 26.99        | 0.51             |
| Atypical   | Negative   | Overall | <b>0.25</b> | <b>0.15</b> | <b>0.42</b>  | <b>&lt;0.001</b> |
|            |            | T=2008  | <b>0.09</b> | <b>0.04</b> | <b>0.25</b>  | <b>&lt;0.001</b> |
|            |            | T=2018  | 0.79        | 0.29        | 2.15         | 0.65             |
| Atypical   | Suspicious | Overall | <b>0.66</b> | <b>0.40</b> | <b>1.04</b>  | <b>0.07</b>      |
|            |            | T=2008  | 0.47        | 0.17        | 1.24         | 0.13             |
|            |            | T=2018  | 0.96        | 0.33        | 3.15         | 0.95             |
| Atypical   | Positive   | Overall | <b>0.44</b> | <b>0.18</b> | <b>1.12</b>  | <b>0.08</b>      |
|            |            | T=2008  | 0.38        | 0.05        | 2.84         | 0.35             |
|            |            | T=2018  | 0.52        | 0.05        | 5.46         | 0.59             |

205

## 206 Comparing UC Assignments between TPS and PMC

207 Diagnoses (645 negative, 340 atypical, 83 suspicious, and 34 positive) were assigned by 10

208 different pathologists under the PMC system. Five pathologists provided UC assignments (722

209 negative, 254 atypical, 83 suspicious, and 43 positive) on the same set of cases from 2008-2018

210 using the TPS system (**Table 2**).

211

212 The cross-tabulated cytological findings in Table 2 suggest moderately high overall agreement

213 between PMC and TPS ( $ICC=0.907$ , 95% CI: 0.883-0.929). Pathologists operating under PMC

214 and TPS tended to agree on negative ( $ICC=0.908$ ) and positive assignments ( $ICC=0.903$ ), while

215 generally in lesser agreement over assignments of atypical ( $ICC=0.744$ ) and suspicious

216 ( $ICC=0.775$ ) UC classes (**Table 3**).

217

218 Notably, there were a few important findings that drove disagreement between the two systems.

219 There were significantly fewer atypical assignments in TPS (n=254) as compared to PMC

220 (n=340) (OR=0.37, 95% CI: [0.25-0.54],  $p<0.001$ ; **Table 4**). A majority of the atypical cases that

221 were reassigned to other UC classes under TPS system were downgraded to negative (n=120),  
 222 compared to PMC (n=44) (OR=0.25, 95% CI: [0.15-0.42], p<0.001; **Table 4**), and as compared  
 223 to other UC classes (suspicious, positive), which were reassigned to less frequently. A few  
 224 atypical findings were reassigned to suspicious (n=33), though reassignments were marginally  
 225 insignificant (OR=0.66, 95% CI: [0.40-1.04], p=0.07; **Table 4**).

226

227 Interestingly, 71 specimens were reassigned from other UC classes under PMC to atypical under  
 228 TPS. There were more negative and positive findings with TPS (n=765=722+43) as compared to  
 229 PMC (n=679=645+34), while the number of suspicious findings did not change although 43  
 230 specimens deemed suspicious under PMC were reassigned under TPS (**Table 2**).

231

232 There appeared to be no impact of specimen artifacts on grading (Supplementary Table 1).

233

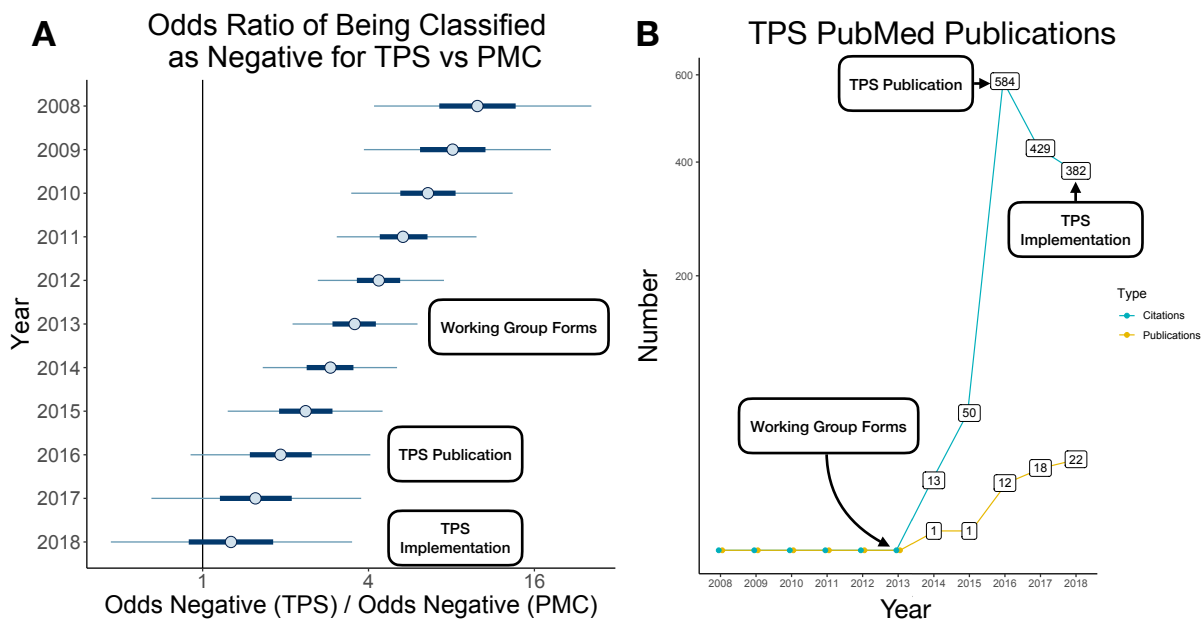

234 **Figure 1: Longitudinal differences in negative UC class assignment under each system: A)**  
 235 Odds ratios (OR) and 95% CI (thin line) for assignment of negative UC class between TPS and  
 236 PMC systems reported yearly in the month of May using the multinomial statistical model; OR  
 237 of 1 (vertical line) indicates no difference in assignment of negatives between TPS and PMC;  
 238

239 OR greater than one indicates that, for the same cases, more negative diagnoses were assigned  
240 using TPS as compared to PMC, with number of atypical UC diagnoses assigned as a reference  
241 (proxy for how PMC atypical diagnoses were reassigned as negative under TPS); results indicate  
242 that differences between the two systems disappeared by 2016, where the credible interval  
243 intersects OR=1; **B**) Number of yearly TPS-related publications across time and number of  
244 articles citing these publications by the writing of this article in 2022 as a proxy for article  
245 influence

246

#### 247 **Longitudinal Changes in UC Diagnostic Findings under PMC**

248 Interestingly, assignment patterns of UC atypical and negative categories under PMC began to  
249 resemble TPS by the end of the collection period and the formal implementation of TPS. At the  
250 beginning of the study period, 2008, pathologists operating under TPS were far less likely to  
251 assign an atypical category as compared to PMC (OR=0.18, 95% CI: [0.09-0.36],  $p<0.001$ ;  
252 **Table 4**), even more so than reported overall across the collection period (OR=0.37, 95% CI:  
253 [0.25-0.54],  $p<0.001$ ; **Table 4**). However, at the end of the collection period, 2018, the  
254 differences between PMC and TPS for atypical assignments had entirely disappeared (OR=0.83,  
255 95% CI: [0.36-1.73],  $p=0.66$ ; **Table 4**). Conversely, the opposite effect can be seen for the  
256 negative UC class– larger differences between PMC and TPS at the start of the collection period  
257 (OR=9.05, 95% CI: [3.47-23.94],  $p<0.001$ ; **Table 4**), even more so than reported across the  
258 collection period (OR=3.56, 95% CI: [2.18-6.02],  $p<0.001$ ; **Table 4**), and then disappearance of  
259 the association near the formal implementation of TPS (OR=1.22, 95% CI: [0.45-3.18],  $p=0.69$ ;  
260 **Table 4**). It should be noted that the time of assessment via PMC and re-assessment via TPS for  
261 2008 cases is separated by more than a decade (2008 versus 2019), while the assessment time  
262 difference has diminished by 2018, hence suggesting potential similarities in reporting of  
263 negative cases towards the conclusion of the collection period. These associations were driven by  
264 reductions in atypical and increases in negative assignments for PMC, relative to TPS, such that  
265 assignment patterns of atypical and negative categories were similar between the two systems by

266 the end of the collection period (2008 OR=0.09, 95% CI: [0.04-0.25],  $p<0.001$ ; 2018 OR=0.79,  
267 95% CI: [0.29-2.15],  $p=0.65$ ). Through longitudinal modeling, the differences between these two  
268 systems may have disappeared as soon as 2016, when TPS was first officially published (**Figure**  
269 **1A**). These findings appear to coincide with the rise in influential TPS-related publications  
270 (**Figure 1B**).

271

## 272 **Discussion**

273 Assessment of urine cytology is currently used for prospective screening and longitudinal  
274 monitoring, while cystoscopy and histological examination of a tissue biopsy provide the  
275 definitive diagnoses for urothelial carcinoma and dictate oncology care<sup>37-39</sup>. Thus, a hybrid  
276 system has evolved in which cytology serves to triage patients to more or less invasive follow up  
277 procedures in a paradigm similar to cervical cancer screening. Reporting standardization enabled  
278 through adoption of well-defined quantitative and qualitative criteria (e.g., TPS) may soon make  
279 cytological analysis a viable alternative to a significant subset of cystoscopies and biopsies by  
280 reducing equivocal diagnoses or reports of “atypia”<sup>42</sup>. This study sought to compare urine  
281 cytology assessment findings between the prior mode of cytologic assessment (PMC) and the  
282 Paris system (TPS) as well as to understand how urine screening assessment changed over the  
283 prior decade given informal adoption of standard TPS criteria.

284

285 Findings from this study corroborate previously published evidence that diagnoses under TPS  
286 discourage “atypia” classifications. In our study, we found that a vast majority of atypical cases  
287 under PMC were instead reclassified as negative under TPS. Many PMC atypical specimens  
288 were also relabeled as suspicious and positive, which suggests that the more definitive TPS

289 criteria may have led to fewer equivocal diagnoses. However, these differences were not uniform  
290 over time, as differences between the PMC and TPS systems were greatest at the beginning of  
291 the study period but negligible immediately before formal implementation of TPS. This suggests  
292 several conclusions: 1) given that TPS was first discussed in 2013 and officially published in  
293 2016, it is possible that cytopathologists may have been influenced by the discussion and  
294 publication of the guidelines, even though official adoption of the guidelines at our institution  
295 did not occur until mid 2018 (e.g., **Figure 1B** uses yearly publications and downstream citations  
296 to discuss the burgeoning influence of the guideline’s discussions and publication), and 2)  
297 previous studies failed to include longitudinal findings for the PMC/TPS comparison. By failing  
298 to stratify or adjust for modification across time, prior studies may have underestimated the  
299 degree to which these two systems initially diverged, as the atypical category was assigned in far  
300 greater numbers by PMC as compared to reassessment by TPS for 2008. The gap between PMC  
301 and TPS had disappeared before 2018, just prior to the implementation of TPS. These findings  
302 have potential implications across other pathology subdisciplines, where timely adoption of new  
303 criteria is of interest as evolving staging/grading guidelines feature more quantitative endpoints.  
304 Efforts to establish rigorous quantitative endpoints for disease pathology may be further  
305 accelerated using computer-assisted diagnostic decision aids (e.g., machine learning)<sup>1,43,44</sup>.  
306  
307 Because several large studies have already examined the differences between TPS and PMC in  
308 their ability to predict definitive diagnoses from cystoscopy and/or biopsy, we opted to not assess  
309 concordance of TPS/PMC with these independent measures. Neither did we seek to compare  
310 differences in assignment patterns between and “within” pathologists via estimates of inter- and  
311 intra-observer reliability, which has been well characterized in the literature and could have

312 potentially impacted final effect estimates (e.g., changes in clinical staff). We did not assess  
313 changes in diagnostic assignment per pathologists across time (i.e., years of experience,  
314 training), which presents an interesting follow-up direction. Other limitations include differences  
315 between real clinical sign-out (as was seen with PMC) and academic/research sign out (seen with  
316 TPS) (e.g., TPS raters did not have access to clinical information or the cytotechnologist's  
317 preliminary diagnoses, both of which can influence final diagnosis in practice). The lack of  
318 clinical information may hamper the ability to apply TPS criteria for the final UC assessment, as  
319 cytologists regularly look for and consider factors such as stones that can cause reactive atypia.  
320 While associations were found that were longitudinal in nature, we are unable to definitely  
321 conclude that publication of TPS influenced assessment prior to adoption of the system in our  
322 institution due to the potential presence of temporal unmeasured confounders. Some potential  
323 unmeasured confounders are known (e.g., attendance at conferences, interactions with other  
324 practicing cytologists, professional social media exchanges as means to get information—e.g.,  
325 Twitter, #CytoChat) while others may be unknown and unanticipated. Nonetheless, this study  
326 evaluated agreement amongst two cytology assessment systems longitudinally over a range not  
327 previously covered by any similar study.

328  
329 The study findings point to the potential role and impact of widespread discussions and  
330 communication on early adoption, dissemination, and implementation of evolving clinical  
331 guidelines. While TPS is now commonplace, reasons for longitudinal differences in PMC prior  
332 to TPS include early publications, presentation of TPS criteria at conferences, interactions and  
333 communication among pathologists across various clinical and virtual settings, and differences in  
334 training/experience. However, reasons for change are nearly impossible to evaluate as such data

335 is not routinely collected, which precludes the application of statistical methodologies (e.g.,  
336 social network analysis, difference-in-differences design, causal inference) that could elucidate  
337 such findings. As similar cytology reporting systems are rolled out or refined (e.g., The Bethesda  
338 systems for thyroid and cervical cytopathology, Milan system for salivary gland cytopathology,  
339 and other standardized reporting systems, such as fluid cytology, breast cytology, etc.), there  
340 exist opportunities to develop and apply innovative data collection and analytical methods to  
341 build a greater understanding of successful guideline adoption strategies. At a minimum,  
342 retrospective comparisons to previous assessment methods prior to official adoption of new  
343 criteria should be performed over a broad time horizon (e.g., 4-5 years as suggested by the  
344 significant study findings) sufficient to characterize changing practices.

345

## 346 **Conclusion**

347 TPS purports to improve reporting of UC by defining clear criteria for diagnostic categories. In  
348 our retrospective study, we provide confirming evidence of the achievement of intended changes  
349 in diagnostic assignment. A unique longitudinal assessment suggested that early adoption of  
350 standard reporting criteria may have occurred prior to the implementation of TPS in our  
351 institution. This will hardly be the last change in reporting practices as increasingly quantitative  
352 and reproducible reporting criteria are adopted. As these practices shift towards quantitative  
353 endpoints, expert time and specialization required for nuanced decision making may increase,  
354 though partial automation of expert decision making may ameliorate its most challenging  
355 aspects. In the future, development and adoption of semi-autonomous classification systems may  
356 present the next step forward in the development of standard reporting criterion, as these  
357 computerized systems can augment the laborious process of cytological inspection and



358 potentially pave the way for adoption of urine cytology as an alternative for cystoscopy for high-  
359 grade urothelial carcinoma.

360

361

362 **References**

363

- 364 1. Vaickus, L. J., Suriawinata, A. A., Wei, J. W. & Liu, X. Automating the Paris System for  
365 urine cytopathology—A hybrid deep-learning and morphometric approach. *Cancer*  
366 *Cytopathology* **127**, 98–115 (2019).
- 367 2. Barkan, G. A. *et al.* The Paris System for Reporting Urinary Cytology: The Quest to Develop  
368 a Standardized Terminology. *ACY* **60**, 185–197 (2016).
- 369 3. Bostwick, D. G. 7 - Urine Cytology. in *Urologic Surgical Pathology (Fourth Edition)* (eds.  
370 Cheng, L., MacLennan, G. T. & Bostwick, D. G.) 322-357.e7 (Elsevier, 2020).  
371 doi:10.1016/B978-0-323-54941-7.00007-4.
- 372 4. Rosolen, D. C. B., Faria, D. K., Faria, C. S. & Antonangelo, L. Performance of the  
373 UroVysion® FISH assay for the diagnosis of malignant effusions using two cutoff  
374 strategies. *Cancer Med* **7**, 1967–1977 (2018).
- 375 5. Sciarra, A. *et al.* Comparison of the clinical usefulness of different urinary tests for the initial  
376 detection of bladder cancer: a systematic review. *Curr Urol* **15**, 22–32 (2021).
- 377 6. Koss, L. G. Errors and pitfalls in cytology of the lower urinary tract. *Monogr Pathol* 60–74  
378 (1997).
- 379 7. Ooms, E. C. & Veldhuizen, R. W. Cytological criteria and diagnostic terminology in urinary  
380 cytology. *Cytopathology* **4**, 51–54 (1993).
- 381 8. Schwalb, D. M., Herr, H. W. & Fair, W. R. The management of clinically unconfirmed  
382 positive urinary cytology. *J Urol* **150**, 1751–1756 (1993).
- 383 9. Owens, C. L., Vandenbussche, C. J., Burroughs, F. H. & Rosenthal, D. L. A review of  
384 reporting systems and terminology for urine cytology. *Cancer Cytopathol* **121**, 9–14 (2013).
- 385 10. Layfield, L. J. *et al.* Accuracy and Reproducibility of Nuclear/Cytoplasmic Ratio  
386 Assessments in Urinary Cytology Specimens. *Diagnostic Cytopathology* **45**, 107–112  
387 (2017).
- 388 11. Vaickus, L. J. & Tambouret, R. H. Young investigator challenge: The accuracy of the  
389 nuclear-to-cytoplasmic ratio estimation among trained morphologists. *Cancer Cytopathol*  
390 **123**, 524–530 (2015).
- 391 12. Voss, J. S. *et al.* Changes in specimen preparation method may impact urine cytologic  
392 evaluation. *Am J Clin Pathol* **130**, 428–433 (2008).
- 393 13. Barkan, G. A. Enough is enough: adequacy of voided urine cytology. *Cancer Cytopathology*  
394 vol. 124 163–166 (2016).
- 395 14. Koss, L. G., Deitch, D., Ramanathan, R. & Sherman, A. B. Diagnostic value of cytology of  
396 voided urine. *Acta cytologica* **29**, 810–816 (1985).
- 397 15. Leyh, H. *et al.* Comparison of the BTA statTM test with voided urine cytology and bladder  
398 wash cytology in the diagnosis and monitoring of bladder cancer. *European urology* **35**, 52–  
399 56 (1999).
- 400 16. Cowan, M. L., Rosenthal, D. L. & VandenBussche, C. J. Improved risk stratification for  
401 patients with high-grade urothelial carcinoma following application of the Paris System for  
402 Reporting Urinary Cytology. *Cancer Cytopathol* **125**, 427–434 (2017).

- 403 17. Deshpande, V. & McKee, G. T. Analysis of atypical urine cytology in a tertiary care center.  
404 *Cancer* **105**, 468–475 (2005).
- 405 18. Piaton, E. *et al.* Diagnostic terminology for urinary cytology reports including the new  
406 subcategories ‘atypical urothelial cells of undetermined significance’ (AUC-US) and ‘cannot  
407 exclude high grade’ (AUC-H). *Cytopathology* **25**, 27–38 (2014).
- 408 19. Mokhtar, G. A., Al-Dousari, M. & Al-Ghamedi, D. Diagnostic significance of atypical  
409 category in the voided urine samples: A retrospective study in a tertiary care center. *Urol*  
410 *Ann* **2**, 100–106 (2010).
- 411 20. Raab, S. S., Grzybicki, D. M., Vrbin, C. M. & Geisinger, K. R. Urine cytology discrepancies:  
412 frequency, causes, and outcomes. *Am J Clin Pathol* **127**, 946–953 (2007).
- 413 21. Granados, R., Duarte, J. A., Corrales, T., Camarmo, E. & Bajo, P. Applying the Paris System  
414 for Reporting Urine Cytology Increases the Rate of Atypical Urothelial Cells in Benign  
415 Cases: A Need for Patient Management Recommendations. *Acta Cytol* **61**, 71–76 (2017).
- 416 22. Chau, K. *et al.* Accuracy and risk of malignancy for diagnostic categories in urine cytology  
417 at a large tertiary institution. *Cancer Cytopathol* **123**, 10–18 (2015).
- 418 23. Brimo, F. *et al.* Accuracy of urine cytology and the significance of an atypical category. *Am*  
419 *J Clin Pathol* **132**, 785–793 (2009).
- 420 24. Simon, C. T. *et al.* The utility of upper urinary tract urine cytology before and after  
421 application of the Paris system. *Diagnostic Cytopathology* **47**, 421–427 (2019).
- 422 25. Roy, M. *et al.* An institutional experience with The Paris System: A paradigm shift from  
423 ambiguous terminology to more objective criteria for reporting urine cytology.  
424 *Cytopathology* **28**, 509–515 (2017).
- 425 26. Mikou, P. *et al.* Evaluation of the Paris System in atypical urinary cytology. *Cytopathology*  
426 **29**, 545–549 (2018).
- 427 27. Glass, R. *et al.* Analysis of the cytomorphological features in atypical urine specimens  
428 following application of the Paris system for reporting urinary cytology. *Acta Cytologica* **62**,  
429 54–61 (2018).
- 430 28. Cimino-Mathews, A. & Ali, S. Z. The clinicopathologic correlates of cellular atypia in  
431 urinary cytology of ileal neobladders. *Acta cytologica* **55**, 449–454 (2011).
- 432 29. Ide, H., Kikuchi, E., Shinoda, K., Mukai, M. & Murai, M. Carcinoma in situ developing in  
433 an ileal neobladder. *Urology* **69**, 576-e9 (2007).
- 434 30. Yamashita, S. *et al.* Urethral recurrence following neobladder in bladder cancer patients. *The*  
435 *Tohoku Journal of Experimental Medicine* **199**, 197–203 (2003).
- 436 31. Hofland, C. A. & Mariani, A. J. Is cytology required for a hematuria evaluation? *The Journal*  
437 *of urology* **171**, 324–326 (2004).
- 438 32. Bürkner, P.-C. Advanced Bayesian Multilevel Modeling with the R Package brms. *The R*  
439 *Journal* **10**, 395–411 (2018).
- 440 33. Bürkner, P.-C. brms: An R Package for Bayesian Multilevel Models Using Stan. *Journal of*  
441 *Statistical Software* **80**, 1–28 (2017).

- 442 34. Makowski, D., Ben-Shachar, M. S., Chen, S. H. A. & Lüdecke, D. Indices of Effect  
443 Existence and Significance in the Bayesian Framework. *Front. Psychol.* **10**, 2767 (2019).
- 444 35. Carpenter, B. *et al.* *Stan: A Probabilistic Programming Language. Grantee Submission* vol.  
445 76 1–32 (2017).
- 446 36. Wickham, H. & Grolemund, G. *R for Data Science: Import, Tidy, Transform, Visualize, and*  
447 *Model Data.* (O'Reilly Media, 2017).
- 448 37. Hassan, M. *et al.* Impact of Implementing the Paris System for Reporting Urine Cytology in  
449 the Performance of Urine Cytology: A Correlative Study of 124 Cases. *American Journal of*  
450 *Clinical Pathology* **146**, 384–390 (2016).
- 451 38. Rohilla, M. *et al.* Cytohistological correlation of urine cytology in a tertiary centre with  
452 application of the Paris system. *Cytopathology* **29**, 436–443 (2018).
- 453 39. Stanzione, N. *et al.* The continual impact of the Paris System on urine cytology, a 3-year  
454 experience. *Cytopathology* **31**, 35–40 (2020).
- 455 40. Kurtycz, D. F. I., Sundling, K. E. & Barkan, G. A. The Paris system of Reporting Urinary  
456 Cytology: Strengths and opportunities. *Diagnostic Cytopathology* **48**, 890–895 (2020).
- 457 41. Rohra, P. *et al.* Effect of the Paris system for reporting urinary cytology with histologic  
458 follow-up. *Diagnostic Cytopathology* **49**, 691–699 (2021).
- 459 42. Torous, V. F., Brancely, D. & VanderLaan, P. A. Implementation of the Paris System for  
460 Reporting Urinary Cytology results in lower atypical diagnostic rates. *Journal of the*  
461 *American Society of Cytopathology* **6**, 205–210 (2017).
- 462 43. Vaickus, L. J. & Tambouret, R. A simplified method for assessing cytotechnologist  
463 workload. *Cancer Cytopathol* **122**, 15–22 (2014).
- 464 44. Sanghvi, A. B., Allen, E. Z., Callenberg, K. M. & Pantanowitz, L. Performance of an  
465 artificial intelligence algorithm for reporting urine cytopathology. *Cancer Cytopathology*  
466 **127**, 658–666 (2019).
- 467  
468  
469
